# Supplementary material for: Synthesis and non-volatile electrical memory characteristics of triphenylamine-based polyimides with flexibility segments
Source: Royal Society of Chemistry journal article supplement (doi:10.1039/c8nj04103b), 2018-01-01
Supplement: c8nj04103b1.pdf [file c8nj04103b1.pdf]

## Supplementary information

### Synthesis and non-volatile electrical memory characteristics of triphenylamine-based polyimides with flexibility segments

Yanhua Yang,<sup>1</sup> Jing-Cheng Xia,<sup>2</sup> Youxuan Zheng,<sup>2</sup> Yingzhong Shen,<sup>1\*</sup> Gaozhang Gou<sup>3\*\*</sup>

<sup>1</sup> Applied Chemistry Department, School of Material Science & Engineering, Nanjing University of Aeronautics & Astronautics, Nanjing, 210016, P. R. China.

<sup>2</sup> State Key Laboratory of coordination chemistry, College of Chemistry and Chemical Engineering, Nanjing University, Nanjing, 210093, P. R. China.

<sup>3</sup> Key Laboratory of Natural Pharmaceutical & Chemical Biology of Yunnan Province, College of Science, Honghe University, Mengzi, 661100, P. R. China.

#### Content

|                                                                                               |   |
|-----------------------------------------------------------------------------------------------|---|
| Figure S1. <sup>1</sup> H NMR spectrum of compound (4) in DMSO- <i>d</i> <sub>6</sub> .....   | 2 |
| Figure S2. <sup>13</sup> C NMR spectrum of compound (4) in DMSO- <i>d</i> <sub>6</sub> .....  | 2 |
| Figure S3. FT-IR spectrum of compound (4) .....                                               | 2 |
| Figure S4. C-H HSQC spectrum of compound (4) in DMSO- <i>d</i> <sub>6</sub> .....             | 3 |
| Figure S5. Relationship between the ON/OFF ratio of current and the the applied voltage ..... | 3 |

---

\* Corresponding author, E-mail address: yz\_shen@nuaa.edu.cn (Y.-Z. S.).

\*\* Corresponding author, E-mail address: hhxylxyhxx@126.com

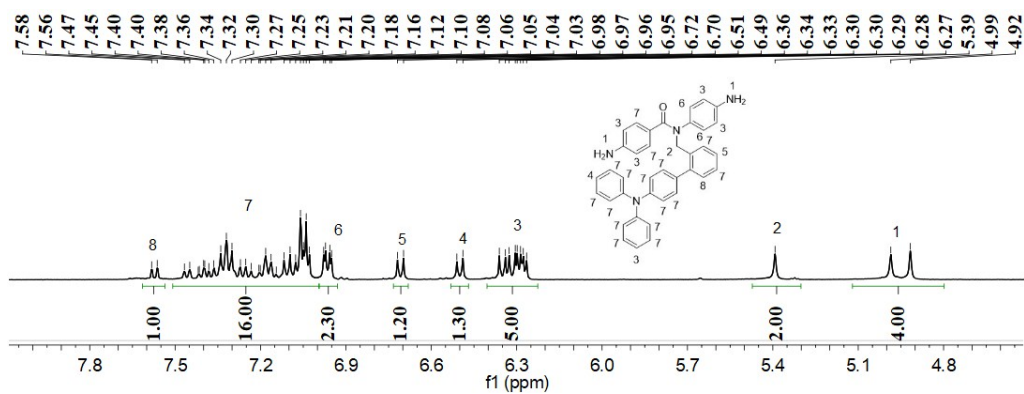

**Figure S1.** <sup>1</sup>H NMR spectrum of compound (4) in DMSO-*d*<sub>6</sub>.

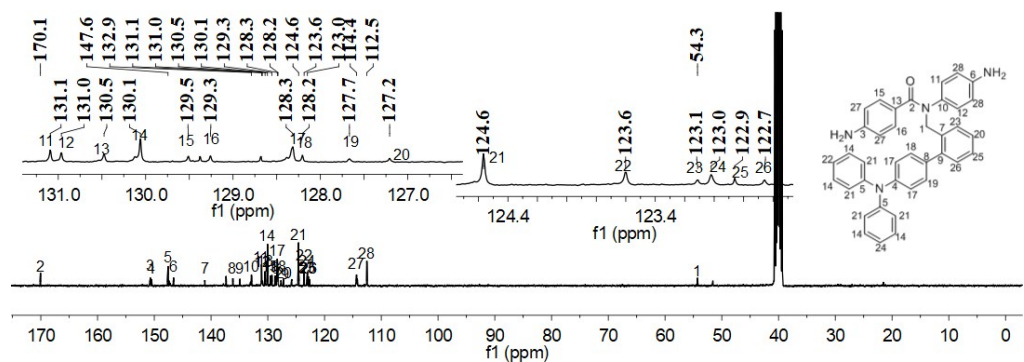

**Figure S2.** <sup>13</sup>C NMR spectrum of compound (4) in DMSO-*d*<sub>6</sub>.

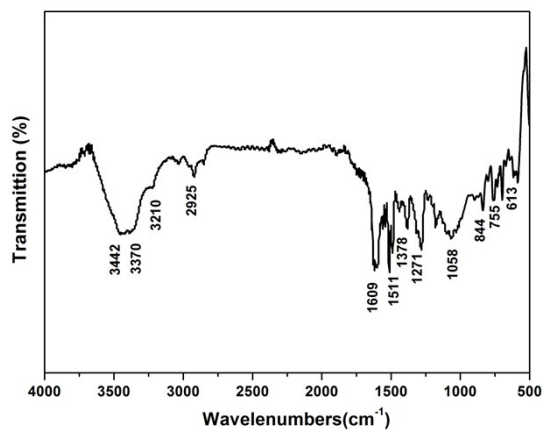

**Figure S3.** FT-IR spectrum of compound (4).

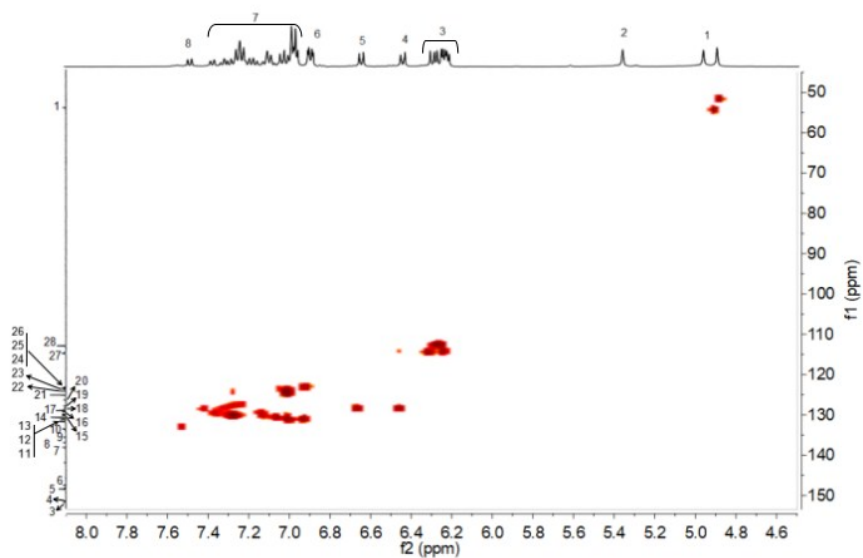

**Figure S4.** C-H HSQC spectrum of compound (4) in DMSO- $d_6$ .

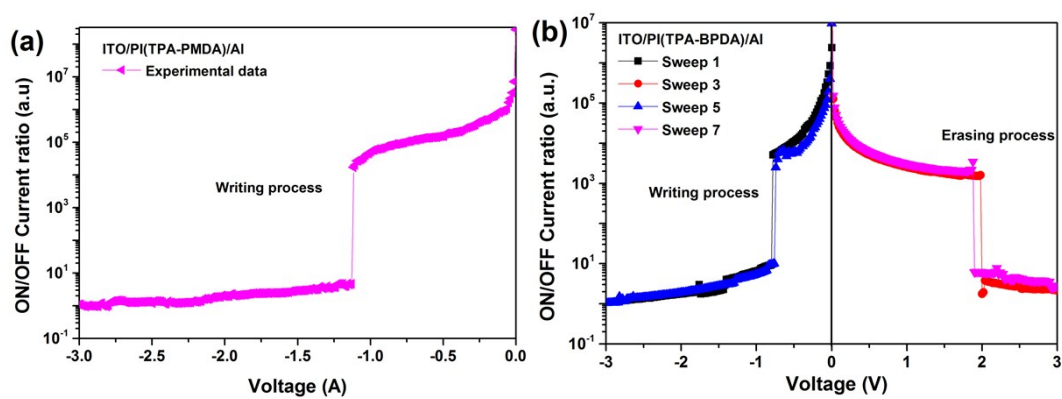

**Figure S5.** Relationship between the ON/OFF ratio of current and the the applied voltage for ITO/PI(TPA-PMDA)/Al and ITO/PI(TPA-BPDA)/Al, respectively.
